# Supplementary material for: Multilocus Phylogeography and Population Genetic Analyses of Opsariichthys hainanensis Reveal Pleistocene Isolation Followed by High Gene Flow around the Gulf of Tonkin
Source: MDPI journal article supplement (doi:10.3390/genes13101908), 2022-10-20
Supplement: s1 [file s1]

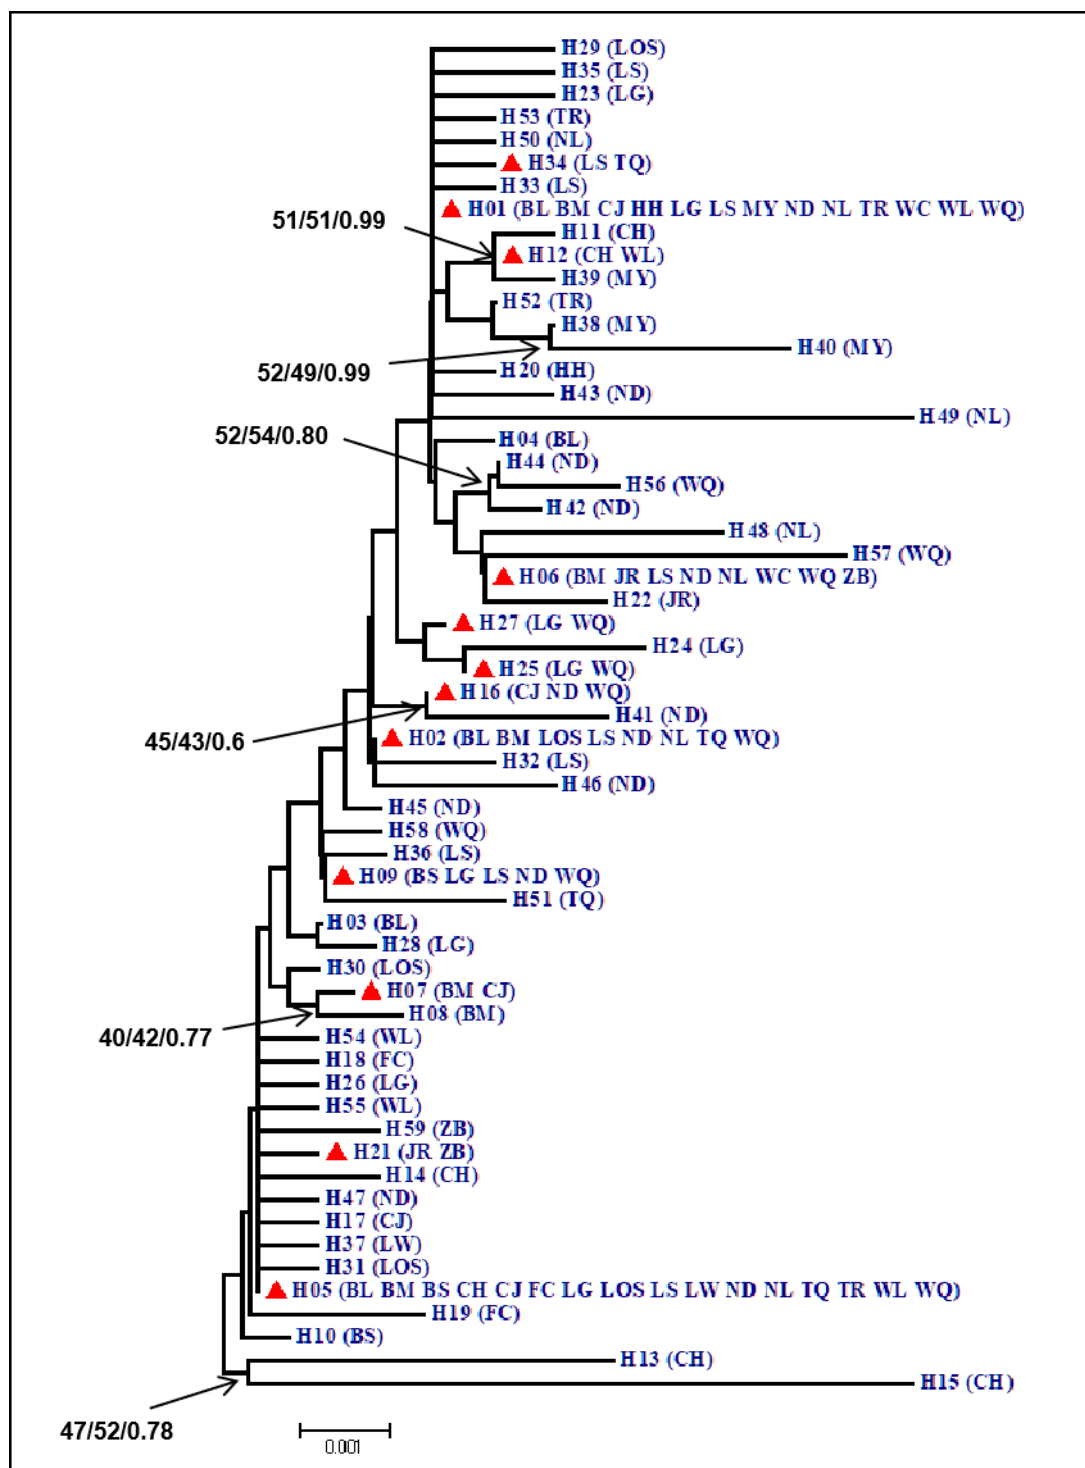

**Figure S1.** NJ tree of genetic relationships based on nuclear RAG1 gene among 21 populations in *Opsariichthys hainanensis* using 59 haplotypes. Red triangles mean shared haplotype.

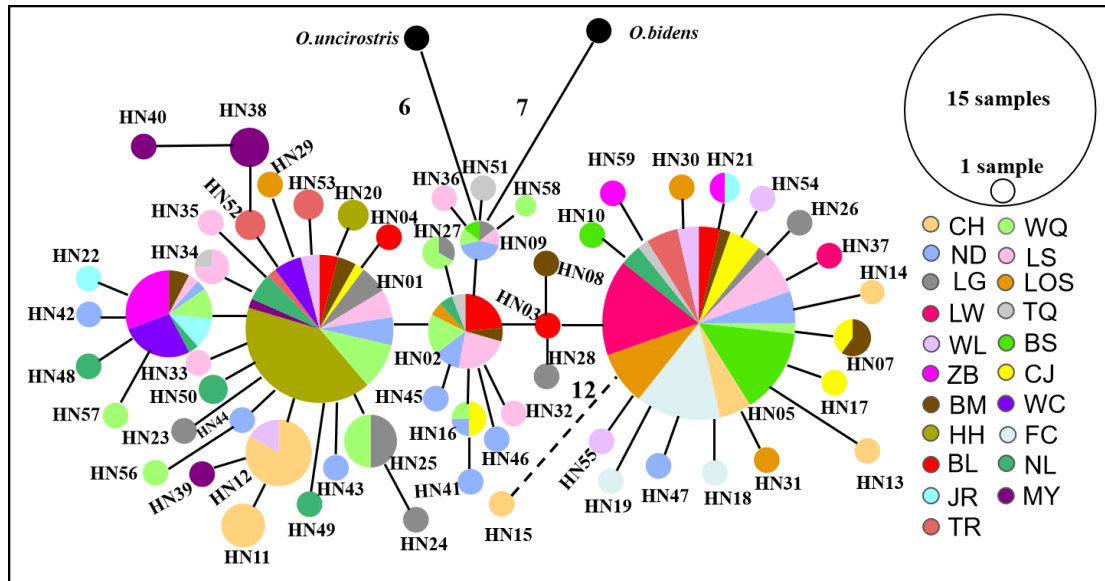

**Figure S2.** Minimum spanning network (MSN) based on mutations between haplotypes observed in populations of *Opsariichthys hainanensis* based on nuclear RAG1 gene. Haplotype designations (Table 1) are indicated next to each circle. Locality designations (see Figure 1) for specimens possessing each haplotype are indicated inside the circles. The sizes of the circles are proportional to the number of individuals represented. The length of the lines between circles is roughly proportional to the estimated number of mutational steps between the haplotypes. *Opsariichthys bidens* and *O. uncirostris* are two species in the genus *Opsariichthys* used as an out-group.

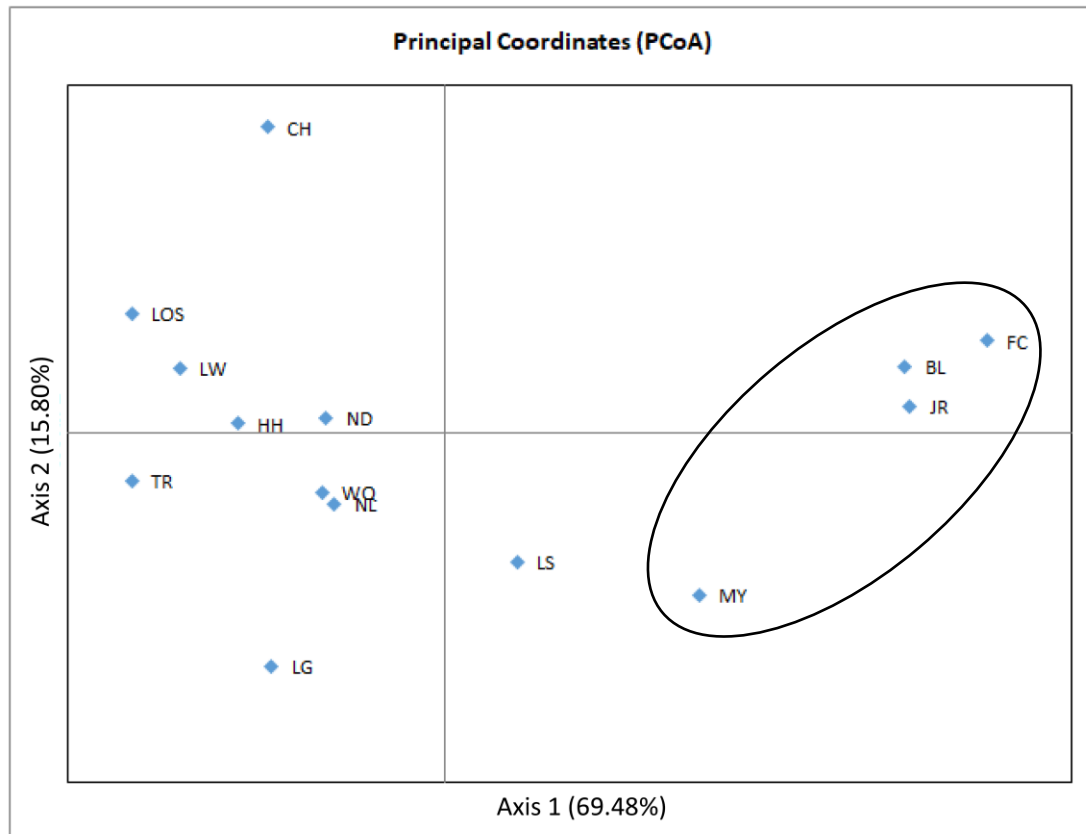

**Figure S3.** Plot of principal coordinate (PCA) axes for fourteen populations of *Opsariichthys hainanensis* based on population genetic distance. Percentage values represent variation justified by each axis. See Table 1 for the sampling sites/population codes. Circle mark the same group.

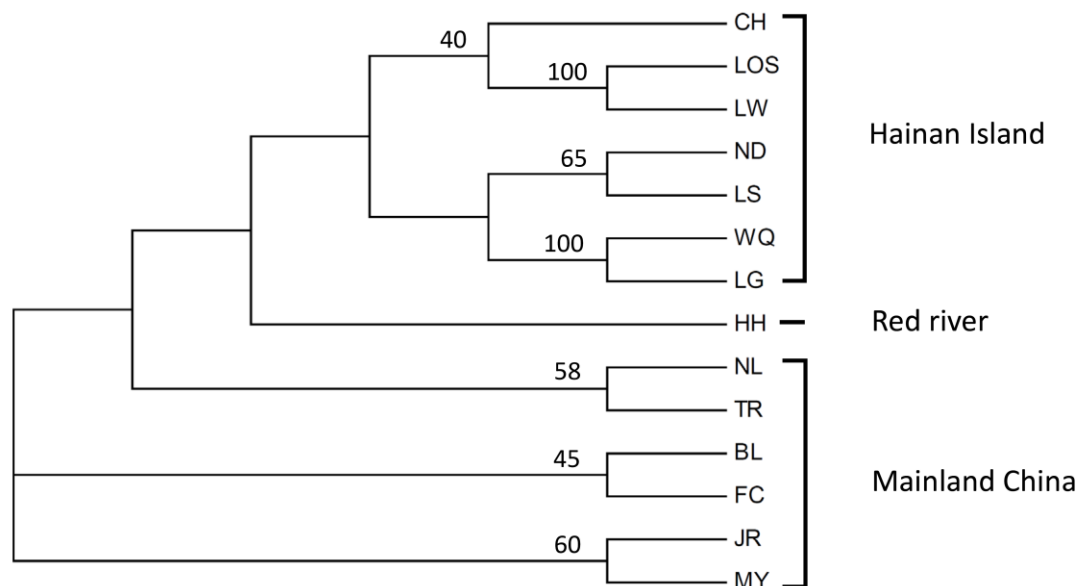

**Figure S4.** A neighbour-joining tree reconstructed based on the Cavalli-Sforza and Edwards genetic distance ( $D_c$ ) among fourteen populations in *Opsariichthys hainanensis* based on microsatellite DNA. See Table 1 for the sampling sites/population codes.

Table S1 Matrix of pairwise  $F_{ST}$  among twenty-one populations based on mtDNA (below diagonal) and nuclear RAG-1 gene (above diagonal) in *Opsariichthys hainanensis*.

|     | CH    | ND    | WQ     | LS     | LG    | LOS    | LW    | TQ     | WL     | BS    | ZB    | CJ     | BM     | WC    | HH    | BL     | FC    | NL    | JR     | MY    | TR     |
|-----|-------|-------|--------|--------|-------|--------|-------|--------|--------|-------|-------|--------|--------|-------|-------|--------|-------|-------|--------|-------|--------|
| CH  |       | 0.196 | 0.213  | 0.186  | 0.207 | 0.310  | 0.445 | 0.162  | 0.085  | 0.423 | 0.261 | 0.282  | 0.212  | 0.295 | 0.282 | 0.185  | 0.432 | 0.134 | 0.223  | 0.391 | 0.147  |
| ND  | 0.722 |       | 0.072  | -0.007 | 0.119 | 0.146  | 0.359 | -0.029 | 0.020  | 0.317 | 0.155 | 0.086  | 0.033  | 0.265 | 0.303 | -0.022 | 0.340 | 0.023 | 0.125  | 0.455 | 0.025  |
| WQ  | 0.464 | 0.511 |        | 0.068  | 0.011 | 0.356  | 0.549 | 0.131  | 0.150  | 0.518 | 0.153 | 0.292  | 0.159  | 0.179 | 0.172 | 0.090  | 0.528 | 0.031 | 0.131  | 0.439 | 0.102  |
| LS  | 0.686 | 0.173 | 0.487  |        | 0.103 | 0.212  | 0.440 | -0.030 | 0.024  | 0.400 | 0.215 | 0.155  | 0.072  | 0.312 | 0.266 | -0.030 | 0.416 | 0.016 | 0.191  | 0.472 | 0.012  |
| LG  | 0.478 | 0.519 | -0.023 | 0.481  |       | 0.333  | 0.545 | 0.129  | 0.127  | 0.512 | 0.259 | 0.285  | 0.178  | 0.333 | 0.289 | 0.121  | 0.512 | 0.066 | 0.226  | 0.462 | 0.095  |
| LOS | 0.730 | 0.923 | 0.511  | 0.888  | 0.585 |        | 0.062 | 0.094  | 0.076  | 0.018 | 0.430 | -0.047 | 0.115  | 0.666 | 0.767 | 0.223  | 0.045 | 0.219 | 0.395  | 0.663 | 0.191  |
| LW  | 0.731 | 0.923 | 0.511  | 0.888  | 0.585 | -0.042 |       | 0.471  | 0.360  | 0.000 | 0.691 | 0.169  | 0.386  | 0.912 | 0.959 | 0.578  | 0.000 | 0.444 | 0.718  | 0.834 | 0.496  |
| TQ  | 0.638 | 0.666 | 0.422  | 0.399  | 0.393 | 0.970  | 0.973 |        | -0.029 | 0.391 | 0.268 | 0.040  | 0.030  | 0.524 | 0.650 | 0.000  | 0.372 | 0.003 | 0.179  | 0.520 | 0.006  |
| WL  | 0.693 | 0.668 | 0.481  | 0.553  | 0.486 | 0.987  | 0.990 | 0.887  |        | 0.306 | 0.253 | 0.050  | 0.025  | 0.453 | 0.508 | 0.242  | 0.304 | 0.022 | 0.202  | 0.504 | -0.021 |
| BS  | 0.685 | 0.714 | 0.505  | 0.602  | 0.513 | 0.970  | 0.972 | 0.815  | 0.868  |       | 0.658 | 0.117  | 0.343  | 0.882 | 0.937 | 0.518  | 0.000 | 0.407 | 0.675  | 0.812 | 0.445  |
| ZB  | 0.677 | 0.581 | 0.455  | 0.490  | 0.456 | 0.965  | 0.967 | 0.756  | 0.852  | 0.827 |       | 0.345  | 0.177  | 0.028 | 0.517 | 0.303  | 0.638 | 0.067 | -0.113 | 0.541 | 0.223  |
| CJ  | 0.628 | 0.348 | 0.408  | 0.284  | 0.386 | 0.917  | 0.919 | 0.481  | 0.633  | 0.648 | 0.287 |        | -0.010 | 0.586 | 0.712 | 0.147  | 0.136 | 0.164 | 0.303  | 0.623 | 0.145  |
| BM  | 0.644 | 0.036 | 0.408  | 0.138  | 0.386 | 0.928  | 0.930 | 0.592  | 0.671  | 0.696 | 0.514 | 0.187  |        | 0.377 | 0.521 | 0.066  | 0.342 | 0.051 | 0.135  | 0.525 | 0.057  |
| WC  | 0.688 | 0.350 | 0.472  | 0.344  | 0.477 | 0.986  | 0.988 | 0.895  | 0.945  | 0.894 | 0.861 | 0.611  | 0.376  |       | 0.694 | 0.511  | 0.846 | 0.122 | 0.058  | 0.651 | 0.398  |
| HH  | 0.666 | 0.837 | 0.576  | 0.799  | 0.626 | 0.918  | 0.919 | 0.862  | 0.887  | 0.878 | 0.874 | 0.820  | 0.827  | 0.883 |       | 0.529  | 0.906 | 0.153 | 0.599  | 0.727 | 0.407  |
| BL  | 0.690 | 0.691 | 0.516  | 0.586  | 0.524 | 0.973  | 0.976 | 0.838  | 0.868  | 0.837 | 0.822 | 0.646  | 0.676  | 0.897 | 0.880 |        | 0.502 | 0.021 | 0.283  | 0.565 | 0.031  |
| FC  | 0.665 | 0.512 | 0.445  | 0.380  | 0.438 | 0.954  | 0.956 | 0.647  | 0.767  | 0.764 | 0.477 | 0.211  | 0.413  | 0.785 | 0.856 | 0.751  |       | 0.413 | 0.639  | 0.789 | 0.433  |
| NL  | 0.688 | 0.671 | 0.491  | 0.569  | 0.496 | 0.964  | 0.966 | 0.799  | 0.828  | 0.713 | 0.791 | 0.613  | 0.642  | 0.864 | 0.834 | 0.831  | 0.716 |       | 0.016  | 0.354 | -0.006 |
| JR  | 0.668 | 0.514 | 0.448  | 0.411  | 0.446 | 0.974  | 0.977 | 0.818  | 0.875  | 0.834 | 0.782 | 0.532  | 0.510  | 0.848 | 0.875 | 0.829  | 0.678 | 0.801 |        | 0.519 | 0.177  |
| MY  | 0.684 | 0.568 | 0.469  | 0.460  | 0.473 | 0.978  | 0.980 | 0.844  | 0.899  | 0.859 | 0.813 | 0.584  | 0.566  | 0.878 | 0.881 | 0.857  | 0.723 | 0.825 | 0.711  |       | 0.422  |
| TR  | 0.669 | 0.458 | 0.434  | 0.349  | 0.433 | 0.993  | 0.995 | 0.904  | 0.965  | 0.889 | 0.838 | 0.523  | 0.490  | 0.943 | 0.883 | 0.891  | 0.713 | 0.850 | 0.568  | 0.792 |        |

Table S2. Characteristics and genetic diversity indices for fourteen populations in *Opsariichthys hainanensis*.

| locations<br>(Abbreviation) | Sample size<br>(N) | Number of allele<br>(N <sub>A</sub> ) | Observed<br>heterozygosity<br>(H <sub>O</sub> ) | Expected<br>heterozygosity<br>(H <sub>E</sub> ) | Allele<br>richness<br>(A <sub>R</sub> ) | Inbreeding<br>coefficient<br>(F <sub>IS</sub> ) |
|-----------------------------|--------------------|---------------------------------------|-------------------------------------------------|-------------------------------------------------|-----------------------------------------|-------------------------------------------------|
| <b>Hainan Island</b>        | <b>150</b>         | <b>7.441</b>                          | <b>0.527</b>                                    | <b>0.716</b>                                    | <b>5.489</b>                            | <b>0.264</b>                                    |
| Changhua River (CH)         | 27                 | 9.917                                 | 0.600                                           | 0.815                                           | 6.812                                   | 0.267                                           |
| Nandu River (ND)            | 30                 | 9.333                                 | 0.550                                           | 0.762                                           | 6.091                                   | 0.281                                           |
| Wanqan River (WQ)           | 30                 | 10.008                                | 0.576                                           | 0.787                                           | 6.332                                   | 0.271                                           |
| Lingshui River (LS)         | 30                 | 7.917                                 | 0.478                                           | 0.735                                           | 5.536                                   | 0.354                                           |
| Longgun River (LG)          | 15                 | 6.167                                 | 0.533                                           | 0.705                                           | 5.082                                   | 0.250                                           |
| Longshou River (LOS)        | 8                  | 5.167                                 | 0.479                                           | 0.663                                           | 5.167                                   | 0.291                                           |
| Longwei River (LW)          | 10                 | 3.583                                 | 0.475                                           | 0.546                                           | 3.400                                   | 0.136                                           |
| <b>mainland China</b>       | <b>114</b>         | <b>6.179</b>                          | <b>0.524</b>                                    | <b>0.656</b>                                    | <b>4.892</b>                            | <b>0.209</b>                                    |
| Yuanjiang River (HH)        | 30                 | 10.667                                | 0.559                                           | 0.774                                           | 6.681                                   | 0.281                                           |
| Beilun River (BL)           | 15                 | 4.583                                 | 0.406                                           | 0.544                                           | 3.772                                   | 0.262                                           |
| Fangheng River (FC)         | 15                 | 3.333                                 | 0.402                                           | 0.518                                           | 3.023                                   | 0.229                                           |
| Nanliu River (NL)           | 14                 | 6.917                                 | 0.649                                           | 0.746                                           | 5.693                                   | 0.135                                           |
| Jian River (JR)             | 15                 | 4.750                                 | 0.461                                           | 0.552                                           | 3.833                                   | 0.170                                           |
| Moyang River (MY)           | 15                 | 6.833                                 | 0.525                                           | 0.676                                           | 5.554                                   | 0.230                                           |
| Tan River (TR)              | 10                 | 6.167                                 | 0.664                                           | 0.779                                           | 5.685                                   | 0.154                                           |
| <b>Total</b>                | <b>264</b>         | <b>6.81</b>                           | <b>0.526</b>                                    | <b>0.686</b>                                    | <b>5.190</b>                            | <b>0.237</b>                                    |

Table S3 Characteristics and genetic diversity indices for twelve microsatellite loci in *Opsariichthys hainanensis*.

| Locus                  | Primer sequences                                                                                         | Number of<br>alleles ( $N_a$ ) | Allelic<br>richness<br>( $A_R$ ) | Observed<br>heterozygosity<br>( $H_o$ ) | Expected<br>heterozygosity<br>( $H_e$ ) | Inbreeding<br>coefficient<br>( $F_{IS}$ ) |
|------------------------|----------------------------------------------------------------------------------------------------------|--------------------------------|----------------------------------|-----------------------------------------|-----------------------------------------|-------------------------------------------|
| Loci-<br>1             | 12715_23_TC-F 5'-TGTAACGACGGCCAGTACACAGCAGCCATCTCAATCT-3'<br>12715_23_TC-R 5'-CGGAACGCTCTTTCTCTCT-3'     | 16                             | 7.039                            | 0.309                                   | 0.499                                   | 0.390                                     |
| Loci-<br>2             | 66209_12_CA-F 5'-TGTAACGACGGCCAGTTTGGACCGTTTCCTCCTTAC-3'<br>66209_12_CA-R 5'-AATGGTTACAGTGAGTGATGCT-3'   | 21                             | 8.697                            | 0.319                                   | 0.677                                   | 0.537                                     |
| Loci-<br>3             | 19558_19_CA_F 5'-TGTAACGACGGCCAGTCCGACCAATCAGAGCACAGT-3'<br>19558_19_CA_R 5'-CTTCGACTTACGACATGACCTT-3'   | 23                             | 9.256                            | 0.612                                   | 0.674                                   | 0.097                                     |
| Loci-<br>4             | 46702_25_AC-F 5'-TGTAACGACGGCCAGTCTTGCTCTTCACTGTTGTCACT-3'<br>46702_25_AC-R 5'-GGCTGCTACACTTGCTACTAAT-3' | 19                             | 8.725                            | 0.614                                   | 0.746                                   | 0.182                                     |
| Loci-<br>5             | 29014_21_GT_F 5'-TGTAACGACGGCCAGTCCAGATTGGACCAGTAGTTCAA-3'<br>29014_21_GT_R 5'-TTCTACAAGCCAGCACAGAC-3'   | 25                             | 9.743                            | 0.600                                   | 0.756                                   | 0.213                                     |
| Loci-<br>6             | 47708_24_CA-F 5'-TGTAACGACGGCCAGTAGGCATTACTGATTAGGCACAA-3'<br>47708_24_CA-R 5'-ACATCGTTATGGCAGAACACAA-3' | 28                             | 9.116                            | 0.611                                   | 0.732                                   | 0.169                                     |
| Loci-<br>7             | 16991_11_CA-F 5'-TGTAACGACGGCCAGTGTAGAATCGTGTGCTGTAATG-3'<br>16991_11_CA-R 5'-CTGGGAGCAGGACAGTAAATAC-3'  | 12                             | 5.381                            | 0.407                                   | 0.534                                   | 0.246                                     |
| Loci-<br>8             | 36185_19_GT_F 5'-TGTAACGACGGCCAGTATGCCTATGGAATGTCCTCACT-3'<br>36185_19_GT_R 5'-GACTCATTACGCCAGCACAG-3'   | 21                             | 8.816                            | 0.455                                   | 0.732                                   | 0.386                                     |
| Loci-<br>51469_19_GT-F | 5'-TGTAACGACGGCCAGTCACCAGGCAACAAGGAAGTC-3'                                                               | 16                             | 6.401                            | 0.508                                   | 0.651                                   | 0.225                                     |

|       |               |                                              |        |        |       |       |       |  |
|-------|---------------|----------------------------------------------|--------|--------|-------|-------|-------|--|
| 9     | 51469_19_GT-R | 5'-ATGTGTTCACTCAACTCCAAGT-3'                 |        |        |       |       |       |  |
| Loci- | 69621_12_TG-F | 5'-TGTAACGACGCGCCAGTGCTCCGAGACTCTGACACA-3'   |        |        |       |       |       |  |
| 10    | 69621_12_TG-R | 5'-CGCAAGACGAGAAGTAACAATG-3'                 | 13     | 6.602  | 0.520 | 0.668 | 0.228 |  |
| Loci- | 57732_19_AG-F | 5'-TGTAACGACGCGCCAGTGCTCCTTGGCAACAATAACTG-3' |        |        |       |       |       |  |
| 11    | 57732_19_AG-R | 5'-CACATTCCTCCTCATCCTCAC-3'                  | 23     | 9.503  | 0.687 | 0.781 | 0.124 |  |
| Loci- | 62825_28_AG-F | 5'-TGTAACGACGCGCCAGTGCTTCATGGTGGCTGTAGAG-3'  |        |        |       |       |       |  |
| 12    | 62825_28_AG-R | 5'-TGAATGCTGAGTCCAGTATTGA-3'                 | 30     | 10.711 | 0.664 | 0.782 | 0.157 |  |
| Mean  |               |                                              | 20.583 | 8.332  | 0.526 | 0.686 | 0.241 |  |

---



Table S4 Matrix of pairwise  $F_{ST}$  (below diagonal) and  $R_{ST}$  (above diagonal) among fourteen populations based on microsatellite DNA in *Opsariichthys hainanensis*.

| Population | CH    | ND    | WQ    | LS    | LG    | LOS   | LW    | HH    | BL    | FC    | NL    | JR    | MY    | TR    |
|------------|-------|-------|-------|-------|-------|-------|-------|-------|-------|-------|-------|-------|-------|-------|
| CH         |       | 0.174 | 0.157 | 0.153 | 0.171 | 0.373 | 0.415 | 0.399 | 0.343 | 0.467 | 0.202 | 0.434 | 0.323 | 0.365 |
| ND         | 0.086 |       | 0.144 | 0.088 | 0.142 | 0.478 | 0.557 | 0.379 | 0.393 | 0.484 | 0.159 | 0.450 | 0.436 | 0.354 |
| WQ         | 0.103 | 0.085 |       | 0.116 | 0.137 | 0.385 | 0.485 | 0.325 | 0.351 | 0.465 | 0.018 | 0.478 | 0.414 | 0.322 |
| LS         | 0.111 | 0.057 | 0.101 |       | 0.045 | 0.243 | 0.314 | 0.393 | 0.276 | 0.303 | 0.130 | 0.280 | 0.342 | 0.267 |
| LG         | 0.123 | 0.090 | 0.038 | 0.120 |       | 0.269 | 0.377 | 0.367 | 0.390 | 0.348 | 0.160 | 0.367 | 0.369 | 0.352 |
| LOS        | 0.146 | 0.182 | 0.194 | 0.188 | 0.244 |       | 0.048 | 0.481 | 0.640 | 0.527 | 0.459 | 0.639 | 0.506 | 0.621 |
| LW         | 0.202 | 0.243 | 0.263 | 0.254 | 0.318 | 0.007 |       | 0.563 | 0.692 | 0.615 | 0.558 | 0.694 | 0.564 | 0.691 |
| HH         | 0.131 | 0.138 | 0.124 | 0.150 | 0.133 | 0.223 | 0.283 |       | 0.429 | 0.460 | 0.277 | 0.498 | 0.343 | 0.281 |
| BL         | 0.250 | 0.262 | 0.260 | 0.258 | 0.318 | 0.372 | 0.419 | 0.305 |       | 0.585 | 0.367 | 0.420 | 0.282 | 0.272 |
| FC         | 0.258 | 0.255 | 0.265 | 0.258 | 0.305 | 0.387 | 0.435 | 0.255 | 0.412 |       | 0.531 | 0.620 | 0.569 | 0.594 |
| NL         | 0.113 | 0.121 | 0.134 | 0.109 | 0.157 | 0.223 | 0.294 | 0.156 | 0.226 | 0.259 |       | 0.526 | 0.385 | 0.262 |
| JR         | 0.229 | 0.207 | 0.195 | 0.201 | 0.219 | 0.348 | 0.406 | 0.266 | 0.346 | 0.378 | 0.201 |       | 0.240 | 0.417 |
| MY         | 0.181 | 0.209 | 0.193 | 0.213 | 0.242 | 0.265 | 0.331 | 0.220 | 0.353 | 0.354 | 0.210 | 0.256 |       | 0.253 |
| TR         | 0.121 | 0.133 | 0.123 | 0.141 | 0.163 | 0.203 | 0.277 | 0.143 | 0.279 | 0.288 | 0.102 | 0.228 | 0.190 |       |

Table S5 Bottleneck results for fourteen *Opsariichthys hainanensis* populations based on Wilcoxon's signed-rank test.

| Model                         | Wilcoxon test             | Population   |              |              |              |              |       |          |              |       |       |       |       |       |              |
|-------------------------------|---------------------------|--------------|--------------|--------------|--------------|--------------|-------|----------|--------------|-------|-------|-------|-------|-------|--------------|
|                               |                           | CH           | ND           | WQ           | LS           | LG           | LOS   | LW       | HH           | BL    | FC    | NL    | JR    | MY    | TR           |
| IAM                           | p (one-tail for H excess) | <b>0.001</b> | <b>0.017</b> | <b>0.017</b> | <b>0.007</b> | <b>0.039</b> | 0.425 | 0.064    | <b>0.039</b> | 0.396 | 0.116 | 0.211 | 0.604 | 0.454 | <b>0.046</b> |
| TPM                           | p (one-tail for H excess) | 0.133        | 0.633        | 0.212        | 0.810        | 0.575        | 0.765 | 0.367    | 0.689        | 0.849 | 0.259 | 0.765 | 0.866 | 0.740 | 0.395        |
| SMM                           | p (one-tail for H excess) | 0.968        | 1.000        | 0.998        | 0.998        | 0.883        | 0.998 | 0.633    | 0.999        | 0.982 | 0.311 | 0.993 | 0.994 | 0.945 | 0.740        |
| Allele frequency distribution |                           |              |              |              |              |              |       | L-shaped |              |       |       |       |       |       |              |

Values in boldface type are significant at  $p < 0.05$ .

IAM: infinite allele model; TPM: two-phase mutation model; SMM: stepwise mutation model.

Table S6 The distribution information of the haplotypes in *Opsariichthys hainanensis*

| Population<br>(Abbreviation) | Mitochondrial DNA (cyt <i>b</i> gene<br>and d-loop region) | Nuclear DNA (RAG1)                                                             |
|------------------------------|------------------------------------------------------------|--------------------------------------------------------------------------------|
| Changhua River (CH)          | H15 - H33                                                  | <b>HN05</b> , HN11, <b>HN12</b> , HN13 - HN15                                  |
| Nandu River (ND)             | <b>H06 - H08, H10, H38, H64</b> , H80<br>- H85             | <b>HN01, HN02, HN05, HN06, HN09, HN16</b> ,<br>HN41 - HN47                     |
| Wanqan River (WQ)            | <b>H64</b> , H99 - H111                                    | <b>HN01, HN02, HN05, HN06, HN09, HN16</b> ,<br><b>HN25, HN27</b> , HN56 - HN58 |
| Lingshui River (LS)          | H70, <b>H71</b> - H74                                      | <b>HN01, HN02, HN05, HN06, HN09</b> , HN32 -<br><b>HN34</b> , HN35, HN36       |
| Longgun River (LG)           | H63, <b>H64</b> , H65                                      | <b>HN01, HN05, HN09</b> , HN23 - <b>HN25</b> , HN26,<br><b>HN27</b> , HN28     |
| Longshou River (LOS)         | <b>H66</b> , H67, <b>H68</b> , H69                         | <b>HN02, HN05</b> , HN29 - HN31                                                |
| Longwei River (LW)           | <b>H66, H68</b> , H75                                      | <b>HN05</b> , HN37                                                             |
| Tengqiao River (TQ)          | <b>H71</b> , H92, H93                                      | <b>HN02, HN05, HN34</b> , HN51                                                 |
| Wanglou River (WL)           | H97, H98                                                   | <b>HN01, HN05, HN12</b> , HN54, HN55                                           |
| Baisha River (BS)            | H11 - H14                                                  | <b>HN05, HN09</b> , HN10                                                       |
| Zhubi River (ZB)             | H112 - H117                                                | <b>HN06, HN21</b> , HN59                                                       |
| Chunjiang River (CJ)         | <b>H07</b> , H34 - H37, <b>H38</b> , H39 -<br>H41          | <b>HN01, HN05, HN07, HN16</b> , HN17                                           |
| Beimen River (BM)            | <b>H06 - H08</b> , H09, <b>H10</b>                         | <b>HN01, HN02, HN05 - HN07</b> , HN08                                          |
| Wenchang River (WC)          | H95, H96                                                   | <b>HN01, HN06</b>                                                              |
| Red River (HH)               | H45 - H57                                                  | <b>HN01</b> , HN20                                                             |
| Beilun River (BL)            | H01 - H05                                                  | <b>HN01, HN02, HN03 - HN05</b>                                                 |
| Fangheng River (FC)          | H42 - H44                                                  | <b>HN05</b> , HN18, HN19                                                       |
| Nanliu River (NL)            | H86 - H91                                                  | <b>HN01, HN02, HN05, HN06</b> , HN48 - HN50                                    |
| Jian River (JR)              | H58 - H62                                                  | <b>HN06, HN21</b> , HN22                                                       |
| Moyang River (MY)            | H76 - H79                                                  | <b>HN01</b> , HN38 - HN40                                                      |
| Tan River (TR)               | H94                                                        | <b>HN01, HN05</b> , HN52, HN53                                                 |

Bold text means shared haplotype.
